# Supplementary material
Source: publisher figshare collection journal article supplement (https://sage.figshare.com/ndownloader/files/26578286)
Supplement: Supplementary file 1 [file 26578286]

Archive with 7 entries (7 files):
- coi_disclosure RODEO HSS Journal.pdf
- ICMJE Taylor HSS JOURNAL.pdf
- ICMJE Lamplot HSS JOURNAL.pdf
- ICMJE Lawton HSS JOURNAL.pdf
- coi_disclosure J Dines HSS Journal .pdf
- ICMJE Pinn HSS JOURNAL.pdf
- ICMJE Young HSS JOURNAL.pdf
